# Supplementary material for: CCR4 expression on host T cells is a driver for alloreactive responses and lung rejection
Source: JCI journal article supplement (doi:10.1172/jci.insight.121782), 2019-05-14
Supplement: sd1 [file 1]

# **CCR4 Expression on Host T cells is a Driver for Alloreactive Responses and Lung Rejection**

## **Authors**

Vyacheslav Palchevskiy<sup>1</sup>, Ying Ying Xue<sup>1</sup>, Rita Kern<sup>1</sup>, Stephen S. Weigt<sup>1</sup>, Aric L. Gregson<sup>1</sup>, Sophie X. Song<sup>1</sup>, Michael C. Fishbein<sup>1</sup>, Cory M. Hogaboam<sup>2</sup>, David M. Sayah<sup>1</sup>, Joseph P. Lynch, III<sup>1</sup>, Michael P. Keane<sup>3</sup>, David G. Brooks<sup>4</sup> and John A. Belperio<sup>1\*</sup>.

## **SUPPLEMENTAL DATA**

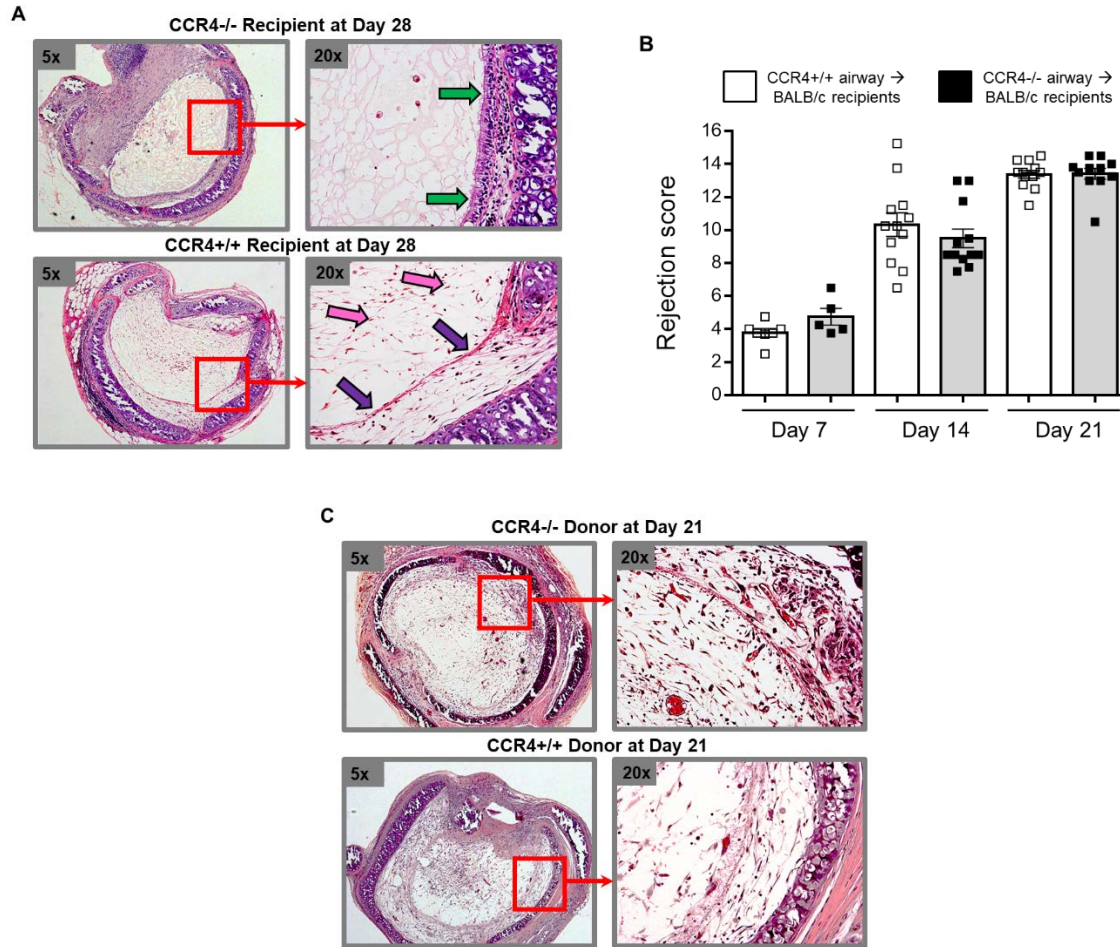

**Supplemental Figure 1. CCR4<sup>-/-</sup> recipients, but not CCR4<sup>-/-</sup> donors attenuate the development of murine airway allograft rejection.** BALB/c airways were subcutaneously transplanted into CCR4<sup>-/-</sup> versus CCR4<sup>+/+</sup> recipients and in separate experiments CCR4<sup>-/-</sup> versus CCR4<sup>+/+</sup> airways were transplanted into BALB/c recipients. (A) Representative H&E staining of airway allografts from CCR4<sup>-/-</sup> and CCR4<sup>+/+</sup> recipients at day 28. Section of the airway allograft is magnified to show the presence of a virtually normal epithelial layer (green arrows) in the airway allografts from the CCR4<sup>-/-</sup> recipients. There is an absence of airway epithelial cells (purple arrows) and a presence of fibroblasts (pink arrows) causing fibro-obliteration of the airway allografts from the CCR4<sup>+/+</sup> recipients. (B) Bar graph indicates rejection scores for CCR4<sup>-/-</sup> as compared to CCR4<sup>+/+</sup> donor airways transplanted into BALB/c recipients at days 7, 14 and 21. (C) Representative H&E staining at day 21 demonstrates complete lumen fibro-obliteration from both CCR4<sup>-/-</sup> and CCR4<sup>+/+</sup> donor airway allografts when transplanted into BALB/c recipients. Data is representative of 5-15 mice per group. Error bars indicate SEM. Significance was determined by Mann-Whitney, \*p<0.05.

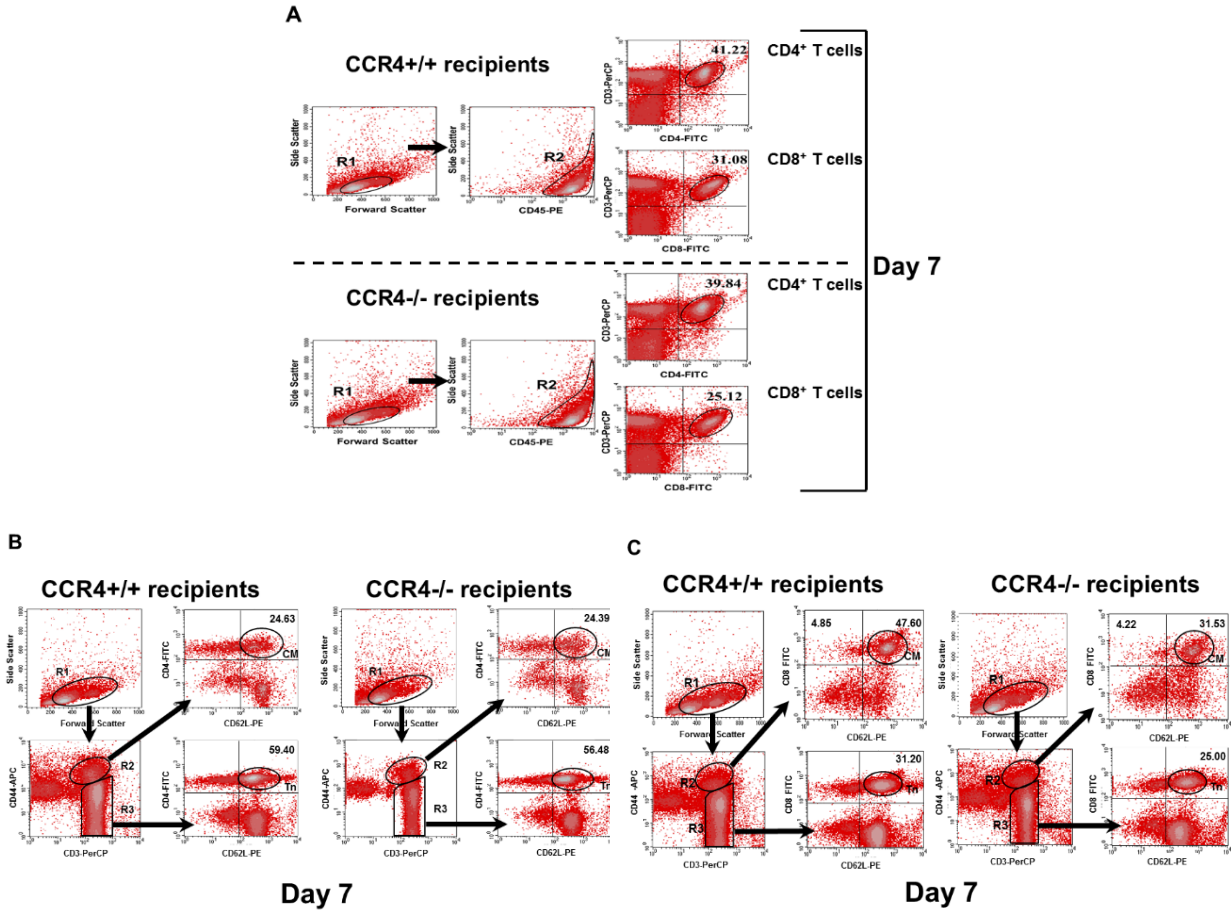

**Supplemental Figure 2. CCR4<sup>-/-</sup> allograft recipients have reduced T cells in draining lymph nodes at day 7.** CCR4<sup>-/-</sup> as compared to CCR4<sup>+/+</sup> allograft recipient draining lymph nodes were harvested for flow cytometry. (A-C) Representative flow cytometry plots of whole draining lymph node single cell suspensions demonstrating the gating strategy used to evaluate the frequency of CD4<sup>+</sup> and CD8<sup>+</sup> T cells and their naïve (Tn) and central memory (CM) cell subpopulations.

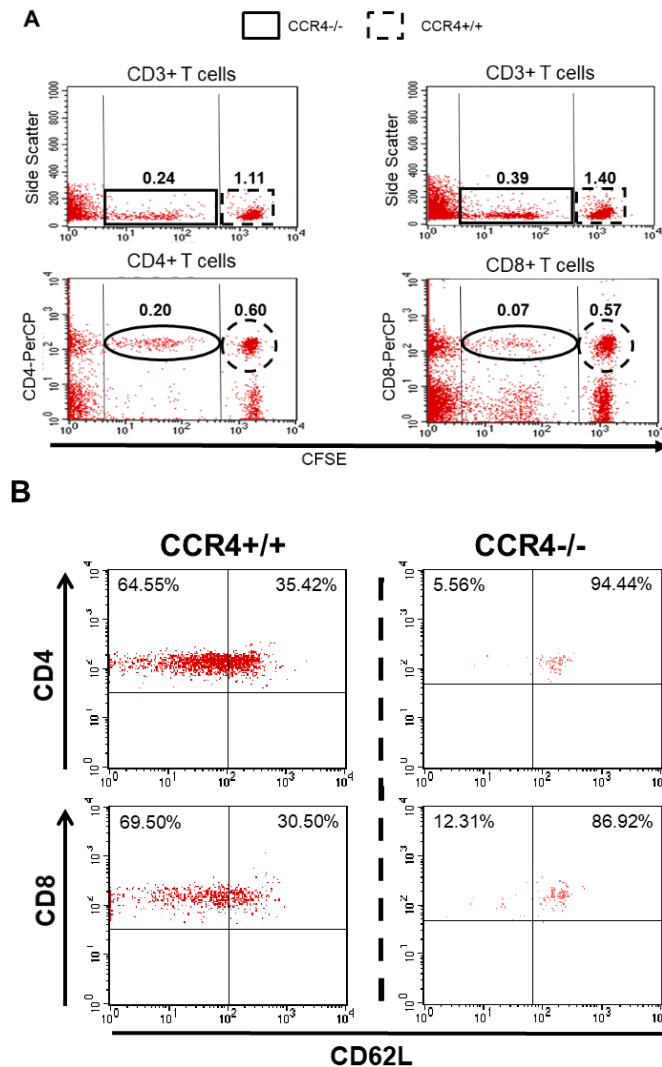

**Supplemental Figure 3. CCR4 expression on T cells is important for homing to draining lymph nodes as well as intranodal T cell activation.** CCR4<sup>+/+</sup> and CCR4<sup>-/-</sup> T cells were labeled with (4.00  $\mu$ M) and (0.25  $\mu$ M) of CFSE; respectively, mixed 1:1 and delivered to day 7 CCR4<sup>+/+</sup> allograft recipients. Eighteen hours later the draining nodes were prepared for flow cytometry. **(A)** Representative flow cytometry plots of whole lymph node single cell suspensions demonstrating the gating strategy used to evaluate the frequency of labeled CD3<sup>+</sup>, CD3<sup>+</sup>CD4<sup>+</sup>, and CD3<sup>+</sup>CD8<sup>+</sup> T cells after transfer from naïve CCR4<sup>-/-</sup> versus CCR4<sup>+/+</sup> mice. **(B)** Representative flow cytometry plots of whole lymph node single cell suspensions demonstrating the gating strategy used to evaluate naïve T cell (Tn) shedding of the adhesion molecule, CD62L via gating on the CCR4<sup>-/-</sup> versus CCR4<sup>+/+</sup> CD4<sup>+</sup>CFSE<sup>+</sup>CD3<sup>+</sup>CD44<sup>low/neg</sup> and CD8<sup>+</sup>CFSE<sup>+</sup>CD3<sup>+</sup>CD44<sup>low/neg</sup> subpopulations.

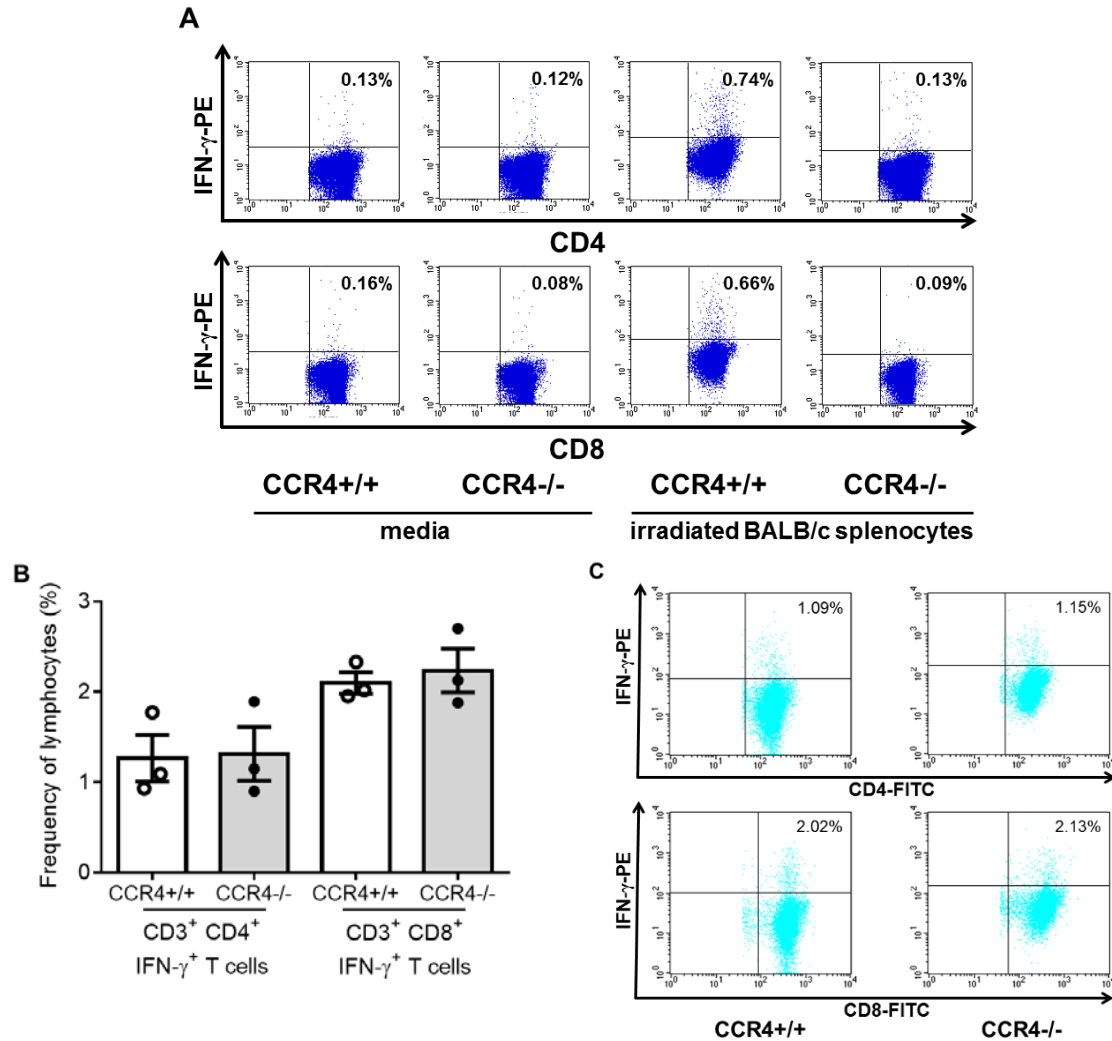

**Supplemental Figure 4. CCR4<sup>-/-</sup> allograft recipients have a reduction in the clonal expansion of CD4<sup>+</sup> and CD8<sup>+</sup> T cells.** Day 7 CCR4<sup>-/-</sup> versus CCR4<sup>+/+</sup> airway allograft recipient's draining lymph nodes single cell suspensions were challenged ex vivo for 16 hours with donor irradiated BALB/c splenocytes and analyzed for T cell secretion of IFN-γ via flow cytometry. In separate experiments CCR4<sup>-/-</sup> versus CCR4<sup>+/+</sup> T cells from naïve mice were challenged with superantigen Staphylococcal Enterotoxin B for 16 hours to determine T cell secretion of IFN-γ. **(A)** Representative example of the flow cytometry gating strategy evaluating recipient draining nodes alloresponsive CD4<sup>+</sup> and CD8<sup>+</sup> T cells secreting IFN-γ via gated on CD3<sup>+</sup>CD4<sup>+</sup>IFN-γ<sup>+</sup> and CD3<sup>+</sup>CD8<sup>+</sup>IFN-γ<sup>+</sup> cells. **(B)** Bar graph depicts CD4<sup>+</sup> and CD8<sup>+</sup> T cells from naïve CCR4<sup>-/-</sup> and CCR4<sup>+/+</sup> mice that express IFN-γ after superantigen Staphylococcal Enterotoxin B challenge. **(C)** Representative example of flow cytometry gating strategy evaluating CD4<sup>+</sup> and CD8<sup>+</sup> T cells secreting IFN-γ from naïve mice after superantigen Staphylococcal Enterotoxin B challenge via gated on CD3<sup>+</sup>CD4<sup>+</sup>IFN-γ<sup>+</sup> and CD3<sup>+</sup>CD8<sup>+</sup>IFN-γ<sup>+</sup> cells. Data is representative of 3-12 mice per group. Error bars indicate SEM. Significance was determined by Mann-Whitney, \*p<0.05.



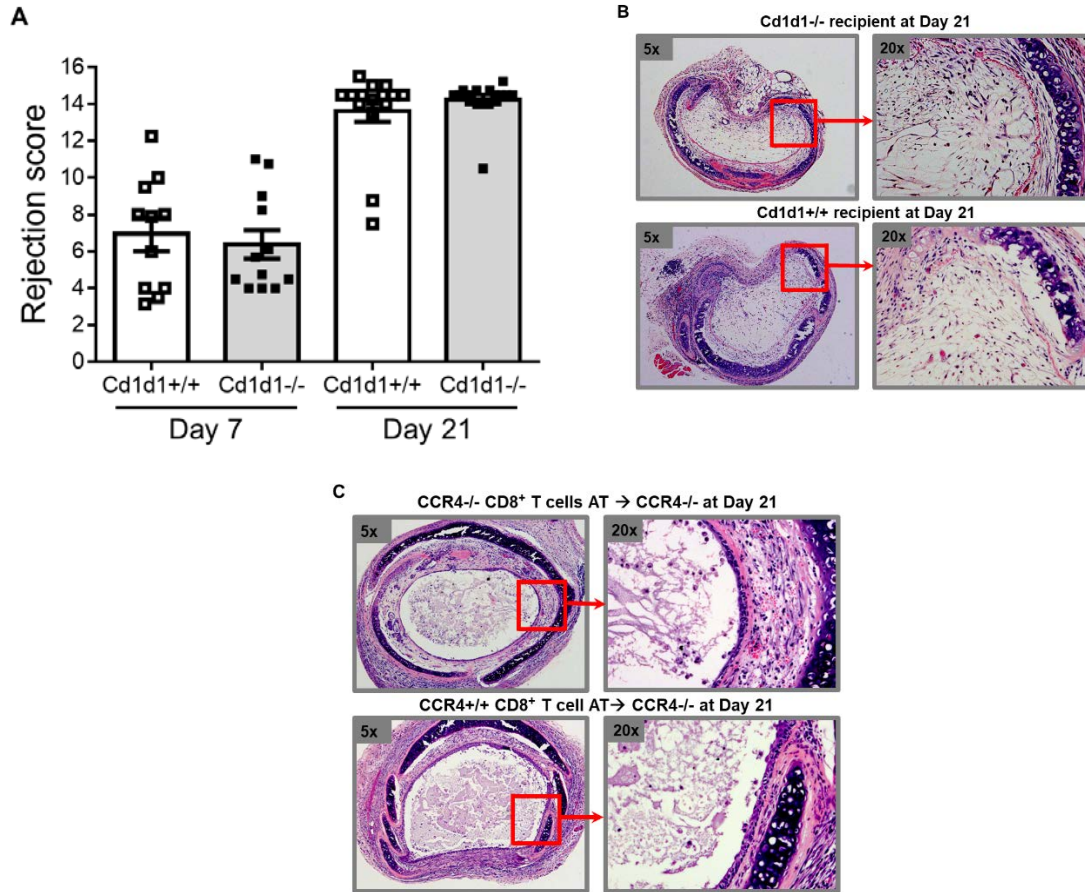

**Supplemental Figure 5. Cd1d<sup>-/-</sup> recipients as well as the adoptive transfer of CCR4<sup>+/+</sup> CD8<sup>+</sup> T cells to CCR4<sup>-/-</sup> recipients does not affect airway rejection.** BALB/c airways were transplanted into C57BL/6 Cd1d<sup>-/-</sup> versus Cd1d<sup>+/+</sup> mice. In separate experiments ( $5 \times 10^6$ ) CD8<sup>+</sup> T cells from either CCR4<sup>-/-</sup> or CCR4<sup>+/+</sup> naïve mice were transferred to CCR4<sup>-/-</sup> recipients of BALB/c airway grafts on day 0 and the allografts were analyzed for rejection scores at day 21. **(A)** Bar graph depicts the rejection scores of airway allografts from Cd1d<sup>-/-</sup> as compared to Cd1d<sup>+/+</sup> recipients at days 7 and 21. **(B)** Representative hematoxylin and eosin (H&E) staining of transplanted BALB/c airway allografts from Cd1d<sup>-/-</sup> and Cd1d<sup>+/+</sup> recipients at day 21, both demonstrating intraluminal inflammation, loss of the epithelium and fibro-obliteration. **(C)** Representative H&E staining of allograft airways from CCR4<sup>-/-</sup> recipients after day 0 adoptive transfer of CD8<sup>+</sup> T cells from either CCR4<sup>+/+</sup> or CCR4<sup>-/-</sup> naïve mice both demonstrating mild intraluminal inflammation, preserved epithelium and no fibro-obliteration at day 21. Data is representative of 10-16 mice per group. Error bars indicate SEM. Significance was determined by Mann-Whitney, \* $p < 0.05$ .

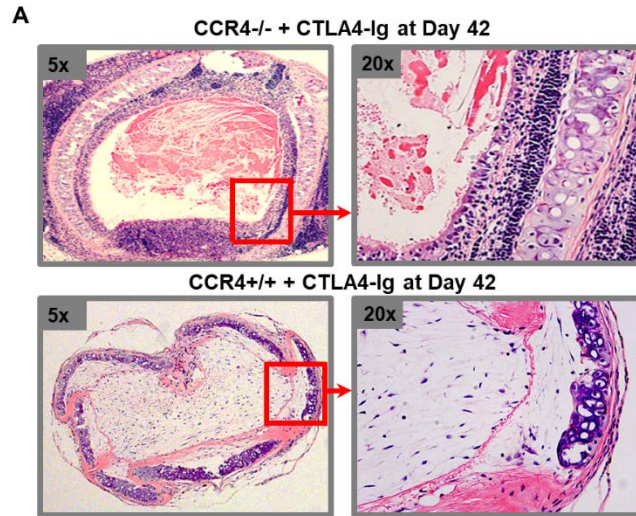

**Supplemental Figure 6. CTLA4-Ig combined with CCR4<sup>-/-</sup> recipients leads to long-term airway allograft accommodation.** CTLA4-Ig given intraperitoneal (i.p.) at 0.2 mg on day 0 prior to airway transplantation and at days 2, 4, and 6 post-transplant to CCR4<sup>-/-</sup> versus CCR4<sup>+/+</sup> recipients and grafts harvested to quantitate rejection at day 42. (A) Representative H&E staining of CCR4<sup>-/-</sup> and CCR4<sup>+/+</sup> recipients given CTLA4-Ig at day 42. CTLA4-Ig given to CCR4<sup>-/-</sup> recipients demonstrate virtually normal airways with intact ciliated epithelium and no fibro-obliteration. CTLA4-Ig given to CCR4<sup>+/+</sup> recipients leads to airways that are rejected and invaded by fibroblasts causing fibro-obliteration. Section of airway allograft is magnified to show the presence of the epithelial layer in CTLA4-Ig + CCR4<sup>-/-</sup> and absence of the epithelial layer with fibro-obliteration in the CTLA4-Ig + CCR4<sup>+/+</sup> recipients.
